# Supplementary material for: Association between Influenza Vaccination and the Risk of Bell’s Palsy in the Korean Elderly
Source: MDPI journal article supplement (doi:10.3390/vaccines9070746), 2021-07-06
Supplement: s1 [file s1]

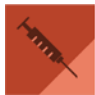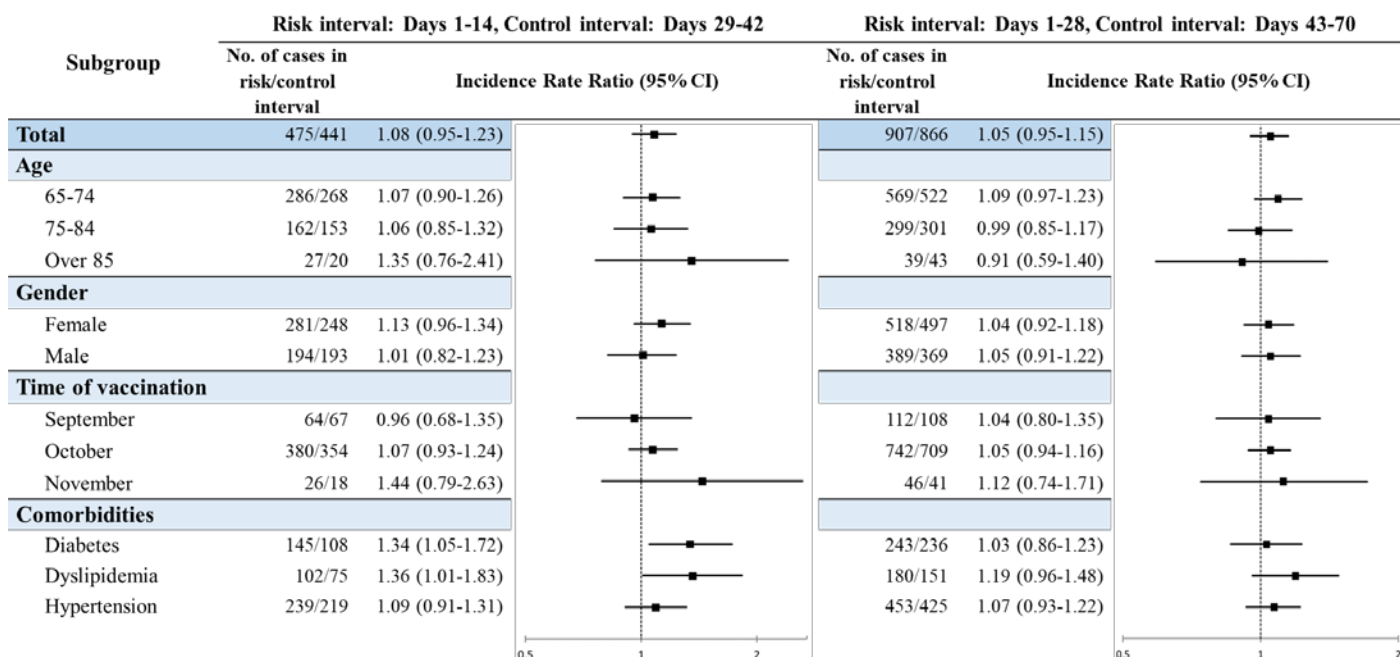

**Figure S1.** Subgroup analysis for the risk of Bell's palsy after influenza vaccination in sensitivity analyses.

**Table S1.** Baseline characteristics of Bell's palsy cases after influenza vaccination for sensitivity analyses.

| Characteristics                | Cases in risk interval     |          | Cases in control interval   |          | <i>p</i>            | Cases in risk interval     |          | Cases in control interval   |          | <i>p</i>            |
|--------------------------------|----------------------------|----------|-----------------------------|----------|---------------------|----------------------------|----------|-----------------------------|----------|---------------------|
|                                | Days 1-14 post-vaccination |          | Days 29-42 post-vaccination |          |                     | Days 1-28 post-vaccination |          | Days 43-70 post-vaccination |          |                     |
|                                | N                          | (%)      | N                           | (%)      |                     | N                          | (%)      | N                           | (%)      |                     |
| Total                          | 475                        | (100%)   | 441                         | (100%)   |                     | 907                        | (100%)   | 866                         | (100%)   |                     |
| Age at vaccination             |                            |          |                             |          |                     |                            |          |                             |          |                     |
| 65-74                          | 286                        | (60.21%) | 268                         | (60.77%) | 0.7322              | 569                        | (62.73%) | 522                         | (60.28%) | 0.5275              |
| 75-84                          | 162                        | (34.11%) | 153                         | (34.69%) |                     | 299                        | (32.97%) | 301                         | (34.76%) |                     |
| Over 85                        | 27                         | (5.68%)  | 20                          | (4.54%)  |                     | 39                         | (4.30%)  | 43                          | (4.97%)  |                     |
| Gender                         |                            |          |                             |          |                     |                            |          |                             |          |                     |
| Female                         | 281                        | (59.16%) | 248                         | (56.24%) | 0.3710              | 518                        | (57.11%) | 497                         | (57.39%) | 0.9055              |
| Male                           | 194                        | (40.84%) |                             | (43.76%) |                     | 389                        | (42.89%) | 369                         | (42.61%) |                     |
| Months of vaccination          |                            |          |                             |          |                     |                            |          |                             |          |                     |
| Jan-Feb                        | 1                          | (0.21%)  | 0                           | (0%)     | 0.2767 <sup>a</sup> | 1                          | (0.11%)  | 4                           | (0.46%)  | 0.3699 <sup>a</sup> |
| Mar-Apr                        | 0                          | (0%)     | 0                           | (0%)     |                     | 0                          | (0%)     | 0                           | (0%)     |                     |
| Sep-Oct                        | 444                        | (93.47%) | 421                         | (95.46%) |                     | 854                        | (94.16%) | 817                         | (94.34%) |                     |
| Nov-Dec                        | 30                         | (6.32%)  | 12                          | (4.33%)  |                     | 52                         | (5.73%)  | 45                          | (5.20%)  |                     |
| Type of vaccinated institution |                            |          |                             |          |                     |                            |          |                             |          |                     |
| Private health institution     | 400                        | (84.21%) | 375                         | (85.03%) | 0.7300              | 761                        | (83.90%) | 714                         | (82.45%) | 0.4128              |
| Public health institution      | 75                         | (15.79%) | 66                          | (14.67%) |                     | 146                        | (16.10%) | 152                         | (17.55%) |                     |
| Vaccinated regions             |                            |          |                             |          |                     |                            |          |                             |          |                     |
| Capital region                 | 188                        | (39.58%) | 160                         | (36.28%) | 0.3349              | 358                        | (39.47%) | 363                         | (41.92%) | 0.3915              |
| Metropolitan city              | 126                        | (26.53%) | 111                         | (25.17%) |                     | 233                        | (25.69%) | 200                         | (23.09%) |                     |
| Others                         | 161                        | (33.89%) | 170                         | (38.55%) |                     | 316                        | (34.84%) | 303                         | (34.99%) |                     |
| Setting of diagnosis           |                            |          |                             |          |                     |                            |          |                             |          |                     |
| Inpatient                      | 103                        | (21.68%) | 107                         | (24.26%) | 0.3535              | 188                        | (20.73%) | 183                         | (21.13%) | 0.8344              |
| Outpatient                     | 372                        | (78.32%) | 334                         | (75.74%) |                     | 719                        | (79.27%) | 683                         | (78.87%) |                     |

**Table S2.** Risk of Bell's palsy after influenza vaccination by the month of vaccination

| Time period *           | No. of cases<br>in risk<br>interval <sup>†</sup> | No. of cases<br>in control<br>interval <sup>‡</sup> | IRR (95% CI)      | No. of cases<br>in risk<br>interval <sup>§</sup> | No. of cases<br>in control<br>interval <sup>  </sup> | IRR (95% CI)      | No. of cases<br>in risk<br>interval <sup>¶</sup> | No. of cases<br>in control<br>interval <sup>#</sup> | IRR (95% CI)      |
|-------------------------|--------------------------------------------------|-----------------------------------------------------|-------------------|--------------------------------------------------|------------------------------------------------------|-------------------|--------------------------------------------------|-----------------------------------------------------|-------------------|
| <b>Total</b>            |                                                  |                                                     |                   |                                                  |                                                      |                   |                                                  |                                                     |                   |
| September               | 64                                               | 67                                                  | 0.96 (0.68-1.35)  | 112                                              | 108                                                  | 1.04 (0.80-1.35)  | 179                                              | 181                                                 | 0.99 (0.80-1.22)  |
| October                 | 380                                              | 354                                                 | 1.07 (0.93-1.24)  | 742                                              | 709                                                  | 1.05 (0.94-1.16)  | 1,096                                            | 1,102                                               | 0.99 (0.91-1.08)  |
| November                | 26                                               | 18                                                  | 1.44 (0.79-2.63)  | 46                                               | 41                                                   | 1.12 (0.74-1.71)  | 14                                               | 68                                                  | 0.94 (0.67-1.32)  |
| December                | 4                                                | 2                                                   | 2.00 (0.37-10.92) | 6                                                | 4                                                    | 1.50 (0.42-5.32)  | 8                                                | 6                                                   | 1.33 (0.46-3.84)  |
| <b>2015/2016 season</b> |                                                  |                                                     |                   |                                                  |                                                      |                   |                                                  |                                                     |                   |
| September               | 1                                                | 0                                                   | -                 | 1                                                | 1                                                    | 1.00 (0.06-15.99) | 1                                                | 1                                                   | 1.00 (0.06-15.99) |
| October                 | 131                                              | 125                                                 | 1.05 (0.82-1.34)  | 245                                              | 284                                                  | 0.86 (0.73-1.02)  | 370                                              | 399                                                 | 0.93 (0.80-1.07)  |
| November                | 4                                                | 4                                                   | 1.00 (0.25-4.00)  | 9                                                | 14                                                   | 0.64 (0.28-1.49)  | 13                                               | 19                                                  | 0.68 (0.34-1.39)  |
| December                | 2                                                | 0                                                   | -                 | 3                                                | 2                                                    | 1.50 (0.25-8.98)  | 3                                                | 2                                                   | 1.50 (0.25-8.98)  |
| <b>2016/2017 season</b> |                                                  |                                                     |                   |                                                  |                                                      |                   |                                                  |                                                     |                   |
| September               | 0                                                | 1                                                   | -                 | 0                                                | 0                                                    | -                 | 1                                                | 0                                                   | -                 |
| October                 | 147                                              | 147                                                 | 1.00 (0.80-1.26)  | 301                                              | 263                                                  | 1.14 (0.97-1.35)  | 448                                              | 422                                                 | 1.06 (0.93-1.21)  |
| November                | 5                                                | 5                                                   | 1.00 (0.29-3.45)  | 10                                               | 12                                                   | 0.83 (0.36-1.93)  | 15                                               | 18                                                  | 0.83 (0.42-1.65)  |
| December                | 1                                                | 2                                                   | 0.50 (0.05-5.51)  | 1                                                | 1                                                    | 1.00 (0.06-15.99) | 3                                                | 2                                                   | 1.50 (0.25-8.98)  |
| <b>2017/2018 season</b> |                                                  |                                                     |                   |                                                  |                                                      |                   |                                                  |                                                     |                   |
| September               | 63                                               | 66                                                  | 0.95 (0.68-1.35)  | 111                                              | 107                                                  | 1.04 (0.80-1.35)  | 177                                              | 180                                                 | 0.98 (0.80-1.21)  |
| October                 | 102                                              | 82                                                  | 1.24 (0.93-1.66)  | 196                                              | 162                                                  | 1.21 (0.98-1.49)  | 278                                              | 281                                                 | 0.99 (0.84-1.17)  |
| November                | 17                                               | 9                                                   | 1.89 (0.84-4.24)  | 27                                               | 15                                                   | 1.80 (0.96-3.38)  | 36                                               | 31                                                  | 1.16 (0.72-1.88)  |
| December                | 1                                                | 0                                                   | -                 | 2                                                | 1                                                    | 2.00 (0.18-22.06) | 2                                                | 2                                                   | 1.00 (0.14-7.10)  |

Abbreviations: IRR, incidence rate ratio; CI, confidence interval.

\* Overall, the doses of vaccinations between January and April were rare, and the number of patients who were vaccinated during the period and included in the risk and control

intervals was very small, so they were omitted from the table. <sup>†</sup>Days 1-14 post-vaccination. <sup>‡</sup>Days 29-42 post-vaccination. <sup>§</sup>Days 1-28 post-vaccination. <sup>||</sup>Days 43-70 post-vaccination. <sup>¶</sup>Days 1-42 post-vaccination. <sup>#</sup>Days 57-98 post-vaccination.
